# Supplementary material for: The Geography of Mental Health, Urbanicity, and Affluence
Source: MDPI journal article supplement (doi:10.3390/ijerph20085440), 2023-04-07

| Social Group             | Definition                                                                                                                                                                                                                   |
|--------------------------|------------------------------------------------------------------------------------------------------------------------------------------------------------------------------------------------------------------------------|
| Urban Uptown (U1)        | Home to the most affluent individuals living in the city core, who are able to purchase luxury goods and vacation abroad regularly                                                                                           |
| Midtown Mix (U2)         | Home to those who are younger and have active social lives within the city, leading them to spend money frequently at bars and restaurants while also having the ability to purchase new consumer electronics                |
| Urban Core (U3)          | Contains individuals with more modest incomes; therefore, they are more likely to live in apartments within the city and have less disposable income for eating out and purchasing goods                                     |
| Elite Suburbs (S1)       | Where individuals with six-figure incomes and large homes reside; these individuals spend their money on expensive clothes, cars, and vacations                                                                              |
| The Affluentials (S2)    | Enjoy comfortable living in the suburbs and have white-collar jobs; they consistently buy healthier foods and computer equipment                                                                                             |
| Middleburbs (S3)         | Consist of individuals who are homeowners in the suburbs that shop at midscale department stores and regularly eat at casual-dining restaurants                                                                              |
| Inner Suburbs (S4)       | Home to a mix of young and retired individuals who can be homeowners or renters; these individuals have downscale lifestyles and do not have the ability to eat out or shop regularly                                        |
| Second City Society (C1) | Comprised of individuals who live outside of the urban core, with large homes and holding executive jobs; residents also spend more on casual dining and upscale retailers                                                   |
| City Centers (C2)        | Home to those in satellite cities who are middle class and regularly go to movie theaters and bowling alleys                                                                                                                 |
| Micro-City Mix (C3)      | Consists of downscale, blue-collar residents who do not have readily available disposable income for dining, activities, and goods                                                                                           |
| Landed Gentry (T1)       | Residents live in smaller towns but have large homes, college degrees, and professional jobs; these individuals spend their disposable incomes on cars and recreational equipment (e.g., powerboats and four-wheelers)       |
| Country Comfort (T2)     | Home to upper-middle-class individuals who regularly participate in outdoor activities, woodworking, and crafting and prefer to own larger trucks and SUVs                                                                   |
| Middle America (T3)      | Residents are middle to lower-class individuals who prefer fishing, hunting, and meeting at civic clubs; in these remote areas, high school football is a main source of entertainment                                       |
| Rustic Living (T4)       | Residents live in the most remote towns and have modest incomes; these individuals spend their leisure time participating in small-town activities, such as social groups at local churches, veterans' clubs, and car racing |

| Variables  |                                                |
|------------|------------------------------------------------|
| TOTALPOPUL | Total Population 2020                          |
| LACK_HEALT | Lack of health insurance                       |
| PHYSICAL_I | Physical inactivity                            |
| FREQUENT_P | Frequent physical health distress              |
| DRUGS      | Household Avg. expenditure on drugs            |
| PVTY_AGE   | Percent poverty                                |
| UNEMP      | Percent unemployed of the civilian labor force |

U1: Summary Statistics for Coefficients Estimates

| Explanatory Variables        | Mean     | Standard Deviation | Minimum | Median  | Maximum |
|------------------------------|----------|--------------------|---------|---------|---------|
| Intercept                    | -0.06    | 0.38               | -0.9354 | -0.1017 | 0.914   |
| TOTALPOPUL                   | 0.03     | 0.09               | -0.2124 | 0.0279  | 0.3209  |
| LACK_HEALT                   | 0.55     | 0.33               | -0.2827 | 0.6281  | 1.2249  |
| PHYSICAL_I                   | -0.74    | 0.47               | -1.5358 | -0.5458 | -0.0341 |
| FREQUENT_P                   | 0.44     | 0.29               | -0.2528 | 0.5005  | 0.8671  |
| DRUGS                        | -0.52    | 0.26               | -1.0286 | -0.5495 | 0.0631  |
| PVTY_AGE                     | 0.17     | 0.21               | -0.365  | 0.2222  | 0.5908  |
| UNEMP                        | 0.07     | 0.12               | -0.3468 | 0.05    | 0.3894  |
| Model Diagnostics            |          |                    |         |         |         |
| Statistic                    | MGWR     |                    |         |         |         |
| R-Squared                    | 0.8848   |                    |         |         |         |
| Adjusted R-Squared           | 0.8356   |                    |         |         |         |
| AICc                         | 809.0027 |                    |         |         |         |
| Sigma-Squared                | 0.1643   |                    |         |         |         |
| Sigma-Squared MLE            | 0.1152   |                    |         |         |         |
| Effective Degrees of Freedom | 369.0298 |                    |         |         |         |

Summary of Explanatory Variables and Neighborhoods

| Explanatory Variables | Neighbors<br>(% of Features) <sup>a</sup> | Significant<br>(% of Features) <sup>b</sup> |
|-----------------------|-------------------------------------------|---------------------------------------------|
| Intercept             | 31 (5.89)                                 | 102 (19.39)                                 |
| TOTALPOPUL            | 50 (9.51)                                 | 0 (0.00)                                    |
| LACK_HEALT            | 50 (9.51)                                 | 351 (66.73)                                 |
| PHYSICAL_I            | 50 (9.51)                                 | 415 (78.90)                                 |
| FREQUENT_P            | 50 (9.51)                                 | 382 (72.62)                                 |
| DRUGS                 | 50 (9.51)                                 | 378 (71.86)                                 |
| PVTY_AGE              | 50 (9.51)                                 | 157 (29.85)                                 |
| UNEMP                 | 50 (9.51)                                 | 63 (11.98)                                  |

a: This number in the parenthesis ranges from 0 to 100%, and can be interpreted as a local, regional, global scale based on the geographical context from low to high.

b: In the parentheses, the percentage of features that have significant coefficients of an explanatory variable.

Optimal Bandwidths Search History

| Iterations | Intercept | TOTALPOPUL | LACK_HEALT | PHYSICAL_I | FREQUENT_P | DRUGS | PVTY_AGE | UNEMP | AICc  |
|------------|-----------|------------|------------|------------|------------|-------|----------|-------|-------|
| 1          | 30        | 50         | 50         | 50         | 50         | 50    | 50       | 50    | 883.6 |
| 2          | 30        | 50         | 50         | 50         | 50         | 50    | 50       | 50    | 851   |
| 3          | 30        | 50         | 50         | 50         | 50         | 50    | 50       | 50    | 837.4 |
| 4          | 30        | 50         | 50         | 50         | 50         | 50    | 50       | 50    | 830.1 |
| 5          | 30        | 50         | 50         | 50         | 50         | 50    | 50       | 50    | 825.4 |
| 6          | 30        | 50         | 50         | 50         | 50         | 50    | 50       | 50    | 822.1 |
| 7          | 30        | 50         | 50         | 50         | 50         | 50    | 50       | 50    | 819.7 |
| 8          | 30        | 50         | 50         | 50         | 50         | 50    | 50       | 50    | 817.7 |
| 9          | 31        | 50         | 50         | 50         | 50         | 50    | 50       | 50    | 814.7 |
| 10         | 31        | 50         | 50         | 50         | 50         | 50    | 50       | 50    | 813.1 |
| 11         | 31        | 50         | 50         | 50         | 50         | 50    | 50       | 50    | 811.8 |
| 12         | 31        | 50         | 50         | 50         | 50         | 50    | 50       | 50    | 810.6 |
| 13         | 31        | 50         | 50         | 50         | 50         | 50    | 50       | 50    | 809.7 |
| 14         | 31        | 50         | 50         | 50         | 50         | 50    | 50       | 50    | 809   |

Bandwidth Statistics Summary

| Explanatory Variables | Optimal Number<br>of Neighbors | Effective Number<br>of Parameters | Adjusted<br>Value of<br>Alpha | Adjusted<br>Critical<br>Value of<br>Pseudo-t<br>Statistics |
|-----------------------|--------------------------------|-----------------------------------|-------------------------------|------------------------------------------------------------|
| Intercept             | 31                             | 32.2                              | 0.0016                        | 3.1884                                                     |
| TOTALPOPUL            | 50                             | 20.1                              | 0.0025                        | 3.0458                                                     |
| LACK_HEALT            | 50                             | 15.4                              | 0.0032                        | 2.9627                                                     |
| PHYSICAL_I            | 50                             | 12.95                             | 0.0039                        | 2.9078                                                     |
| FREQUENT_P            | 50                             | 16.09                             | 0.0031                        | 2.9765                                                     |
| DRUGS                 | 50                             | 17.55                             | 0.0028                        | 3.0037                                                     |
| PVTY_AGE              | 50                             | 20.53                             | 0.0024                        | 3.0523                                                     |
| UNEMP                 | 50                             | 22.15                             | 0.0023                        | 3.0756                                                     |

U2: Summary Statistics for Coefficients Estimates

| Explanatory Variables        | Mean     | Standard Deviation | Minimum | Median  | Maximum |
|------------------------------|----------|--------------------|---------|---------|---------|
| Intercept                    | 0.00     | 0.20               | -0.4408 | 0.0199  | 0.4585  |
| TOTALPOPUL                   | 0.00     | 0.09               | -0.2071 | -0.0091 | 0.2422  |
| LACK_HEALT                   | 0.33     | 0.40               | -0.6225 | 0.3414  | 0.9833  |
| PHYSICAL_I                   | -0.44    | 0.31               | -1.0865 | -0.388  | 0.2282  |
| FREQUENT_P                   | 0.28     | 0.28               | -0.1202 | 0.2342  | 0.8784  |
| DRUGS                        | -0.37    | 0.30               | -1.013  | -0.2588 | 0.0742  |
| PVTY_AGE                     | 0.38     | 0.15               | 0.0391  | 0.3728  | 0.7058  |
| UNEMP                        | 0.13     | 0.19               | -0.384  | 0.1389  | 0.6281  |
| Model Diagnostics            |          |                    |         |         |         |
| Statistic                    | MGWR     |                    |         |         |         |
| R-Squared                    | 0.8739   |                    |         |         |         |
| Adjusted R-Squared           | 0.8218   |                    |         |         |         |
| AICc                         | 721.4655 |                    |         |         |         |
| Sigma-Squared                | 0.178    |                    |         |         |         |
| Sigma-Squared MLE            | 0.1261   |                    |         |         |         |
| Effective Degrees of Freedom | 318.599  |                    |         |         |         |

Summary of Explanatory Variables and Neighborhoods

| Explanatory Variables | Neighbors<br>(% of Features) <sup>a</sup> | Significant<br>(% of Features) <sup>b</sup> |
|-----------------------|-------------------------------------------|---------------------------------------------|
| Intercept             | 35 (7.78)                                 | 1 (0.22)                                    |
| TOTALPOPUL            | 50 (11.11)                                | 0 (0.00)                                    |
| LACK_HEALT            | 50 (11.11)                                | 192 (42.67)                                 |
| PHYSICAL_I            | 47 (10.44)                                | 309 (68.67)                                 |
| FREQUENT_P            | 49 (10.89)                                | 167 (37.11)                                 |
| DRUGS                 | 50 (11.11)                                | 113 (25.11)                                 |
| PVTY_AGE              | 49 (10.89)                                | 245 (54.44)                                 |
| UNEMP                 | 50 (11.11)                                | 27 (6.00)                                   |

a: This number in the parenthesis ranges from 0 to 100%, and can be interpreted as a local, regional, global scale based on the geographical context from low to high.

b: In the parentheses, the percentage of features that have significant coefficients of an explanatory variable.

Optimal Bandwidths Search History

| Iterations | Intercept | TOTALPOPUL | LACK_HEALT | PHYSICAL_I | FREQUENT_P | DRUGS | PVTY_AGE | UNEMP | AICc  |
|------------|-----------|------------|------------|------------|------------|-------|----------|-------|-------|
| 1          | 30        | 50         | 50         | 50         | 50         | 50    | 50       | 50    | 797.5 |
| 2          | 30        | 50         | 50         | 50         | 50         | 50    | 49       | 50    | 770.5 |
| 3          | 35        | 50         | 50         | 50         | 49         | 50    | 49       | 50    | 757.8 |
| 4          | 35        | 50         | 50         | 47         | 49         | 50    | 49       | 50    | 748.2 |
| 5          | 35        | 50         | 50         | 47         | 49         | 50    | 49       | 50    | 740.8 |
| 6          | 35        | 50         | 50         | 47         | 49         | 50    | 49       | 50    | 735.2 |
| 7          | 35        | 50         | 50         | 47         | 49         | 50    | 49       | 50    | 730.8 |
| 8          | 35        | 50         | 50         | 47         | 49         | 50    | 49       | 50    | 727.5 |
| 9          | 35        | 50         | 50         | 47         | 49         | 50    | 49       | 50    | 725   |
| 10         | 35        | 50         | 50         | 47         | 49         | 50    | 49       | 50    | 723.3 |
| 11         | 35        | 50         | 50         | 47         | 49         | 50    | 49       | 50    | 722.2 |
| 12         | 35        | 50         | 50         | 47         | 49         | 50    | 49       | 50    | 721.5 |

Bandwidth Statistics Summary

| Explanatory Variables | Optimal Number<br>of Neighbors | Effective Number<br>of Parameters | Adjusted<br>Value of<br>Alpha | Adjusted<br>Critical<br>Value of<br>Pseudo-t<br>Statistics |
|-----------------------|--------------------------------|-----------------------------------|-------------------------------|------------------------------------------------------------|
| Intercept             | 35                             | 24.26                             | 0.0021                        | 3.1069                                                     |
| TOTALPOPUL            | 50                             | 18.01                             | 0.0028                        | 3.015                                                      |
| LACK_HEALT            | 50                             | 14.1                              | 0.0035                        | 2.9378                                                     |
| PHYSICAL_I            | 47                             | 13.16                             | 0.0038                        | 2.9158                                                     |
| FREQUENT_P            | 49                             | 12.14                             | 0.0041                        | 2.8897                                                     |
| DRUGS                 | 50                             | 14.42                             | 0.0035                        | 2.945                                                      |
| PVTY_AGE              | 49                             | 17.04                             | 0.0029                        | 2.9977                                                     |
| UNEMP                 | 50                             | 18.28                             | 0.0027                        | 3.0196                                                     |

U3: Summary Statistics for Coefficients Estimates

| Explanatory Variables | Mean  | Standard Deviation | Minimum | Median  | Maximum |
|-----------------------|-------|--------------------|---------|---------|---------|
| Intercept             | 0.13  | 0.48               | -0.8214 | 0.0241  | 1.6166  |
| TOTALPOPUL            | 0.09  | 0.12               | -0.1385 | 0.0711  | 0.4336  |
| LACK_HEALT            | 0.41  | 0.56               | -1.3402 | 0.5155  | 1.546   |
| PHYSICAL_I            | -0.29 | 0.85               | -1.991  | -0.4106 | 1.3232  |
| FREQUENT_P            | 0.36  | 0.71               | -1.4086 | 0.5038  | 1.3025  |
| DRUGS                 | -0.27 | 0.23               | -0.628  | -0.3162 | 0.2551  |
| PVTY_AGE              | 0.31  | 0.19               | -0.1852 | 0.3364  | 0.8338  |
| UNEMP                 | 0.11  | 0.15               | -0.1202 | 0.0585  | 0.8224  |

Model Diagnostics

| Statistic                    | GWR       | MGWR      |
|------------------------------|-----------|-----------|
| R-Squared                    | 0.9314    | 0.9374    |
| Adjusted R-Squared           | 0.8912    | 0.9058    |
| AICc                         | 1084.1247 | 1054.1923 |
| Sigma-Squared                | 0.1087    | 0.0942    |
| Sigma-Squared MLE            | 0.0686    | 0.0626    |
| Effective Degrees of Freedom | 613.8873  | 646.3472  |

Optimal GWR Bandwidth: 50 (K nearest neighbors).

Summary of Explanatory Variables and Neighborhoods

| Explanatory Variables | Neighbors<br>(% of Features) <sup>a</sup> | Significant<br>(% of Features) <sup>b</sup> |
|-----------------------|-------------------------------------------|---------------------------------------------|
| Intercept             | 30 (3.08)                                 | 128 (13.16)                                 |
| TOTALPOPUL            | 50 (5.14)                                 | 73 (7.50)                                   |
| LACK_HEALT            | 30 (3.08)                                 | 254 (26.10)                                 |
| PHYSICAL_I            | 30 (3.08)                                 | 393 (40.39)                                 |
| FREQUENT_P            | 30 (3.08)                                 | 425 (43.68)                                 |
| DRUGS                 | 50 (5.14)                                 | 374 (38.44)                                 |
| PVTY_AGE              | 50 (5.14)                                 | 296 (30.42)                                 |
| UNEMP                 | 50 (5.14)                                 | 54 (5.55)                                   |

a: This number in the parenthesis ranges from 0 to 100%, and can be interpreted as a local, regional, global scale based on the geographical context from low to high.

b: In the parentheses, the percentage of features that have significant coefficients of an explanatory variable.

Optimal Bandwidths Search History

| Iterations | Intercept | TOTALPOPUL | LACK_HEALT | PHYSICAL_I | FREQUENT_P | DRUGS | PVTY_AGE | UNEMP | AICc |
|------------|-----------|------------|------------|------------|------------|-------|----------|-------|------|
| 0          | 50        | 50         | 50         | 50         | 50         | 50    | 50       | 50    | 1084 |
| 1          | 30        | 50         | 30         | 30         | 30         | 50    | 50       | 50    | 1107 |
| 2          | 30        | 50         | 30         | 30         | 30         | 50    | 50       | 50    | 1070 |
| 3          | 30        | 50         | 30         | 30         | 30         | 50    | 50       | 50    | 1059 |
| 4          | 30        | 50         | 30         | 30         | 30         | 50    | 50       | 50    | 1054 |

Bandwidth Statistics Summary

| Explanatory Variables | Optimal Number<br>of Neighbors | Effective Number<br>of Parameters | Adjusted<br>Value of<br>Alpha | Adjusted<br>Critical<br>Value of<br>Pseudo-t<br>Statistics |
|-----------------------|--------------------------------|-----------------------------------|-------------------------------|------------------------------------------------------------|
| Intercept             | 30                             | 48.19                             | 0.001                         | 3.2951                                                     |
| TOTALPOPUL            | 50                             | 37.14                             | 0.0013                        | 3.22                                                       |
| LACK_HEALT            | 30                             | 47.49                             | 0.0011                        | 3.291                                                      |
| PHYSICAL_I            | 30                             | 47.68                             | 0.001                         | 3.2921                                                     |
| FREQUENT_P            | 30                             | 43.79                             | 0.0011                        | 3.2676                                                     |
| DRUGS                 | 50                             | 34.14                             | 0.0015                        | 3.1954                                                     |
| PVTY_AGE              | 50                             | 32.08                             | 0.0016                        | 3.1771                                                     |
| UNEMP                 | 50                             | 36.14                             | 0.0014                        | 3.212                                                      |

S1: Summary Statistics for Coefficients Estimates

| Explanatory Variables | Mean  | Standard Deviation | Minimum | Median  | Maximum |
|-----------------------|-------|--------------------|---------|---------|---------|
| Intercept             | 0.32  | 0.65               | -0.8855 | 0.3463  | 2.1132  |
| TOTALPOPUL            | 0.00  | 0.08               | -0.2481 | 0.0047  | 0.2133  |
| LACK_HEALT            | 1.25  | 0.67               | 0.0305  | 1.1912  | 2.8495  |
| PHYSICAL_I            | -0.78 | 0.41               | -1.6826 | -0.7969 | 0.1717  |
| FREQUENT_P            | 0.36  | 0.20               | -0.3037 | 0.404   | 0.6936  |
| DRUGS                 | -0.40 | 0.17               | -0.908  | -0.3733 | -0.0597 |
| PVTY_AGE              | 0.06  | 0.16               | -0.3337 | 0.0354  | 0.5413  |
| UNEMP                 | 0.10  | 0.13               | -0.1526 | 0.069   | 0.547   |

Model Diagnostics

| Statistic                    | GWR      | MGWR     |
|------------------------------|----------|----------|
| R-Squared                    | 0.8803   | 0.8889   |
| Adjusted R-Squared           | 0.8081   | 0.8366   |
| AICc                         | 827.5506 | 791.8382 |
| Sigma-Squared                | 0.1917   | 0.1632   |
| Sigma-Squared MLE            | 0.1197   | 0.1111   |
| Effective Degrees of Freedom | 310.9796 | 339.0367 |

Optimal GWR Bandwidth: 50 (K nearest neighbors).

Summary of Explanatory Variables and Neighborhoods

| Explanatory Variables | Neighbors<br>(% of Features) <sup>a</sup> | Significant<br>(% of Features) <sup>b</sup> |
|-----------------------|-------------------------------------------|---------------------------------------------|
| Intercept             | 30 (6.02)                                 | 185 (37.15)                                 |
| TOTALPOPUL            | 50 (10.04)                                | 0 (0.00)                                    |
| LACK_HEALT            | 38 (7.63)                                 | 319 (64.06)                                 |
| PHYSICAL_I            | 48 (9.64)                                 | 312 (62.65)                                 |
| FREQUENT_P            | 50 (10.04)                                | 191 (38.35)                                 |
| DRUGS                 | 50 (10.04)                                | 233 (46.79)                                 |
| PVTY_AGE              | 50 (10.04)                                | 35 (7.03)                                   |
| UNEMP                 | 50 (10.04)                                | 26 (5.22)                                   |

a: This number in the parenthesis ranges from 0 to 100%, and can be interpreted as a local, regional, global scale based on the geographical context from low to high.

b: In the parentheses, the percentage of features that have significant coefficients of an explanatory variable.

Optimal Bandwidths Search History

| Iterations | Intercept | TOTALPOPUL | LACK_HEALT | PHYSICAL_I | FREQUENT_P | DRUGS | PVTY_AGE | UNEMP | AICc  |
|------------|-----------|------------|------------|------------|------------|-------|----------|-------|-------|
| 0          | 50        | 50         | 50         | 50         | 50         | 50    | 50       | 50    | 827.6 |
| 1          | 30        | 50         | 33         | 39         | 50         | 48    | 50       | 50    | 829.5 |
| 2          | 30        | 50         | 33         | 39         | 50         | 49    | 50       | 50    | 801.5 |
| 3          | 30        | 50         | 34         | 42         | 50         | 50    | 50       | 50    | 797   |
| 4          | 30        | 50         | 34         | 43         | 50         | 50    | 50       | 50    | 795.1 |
| 5          | 30        | 50         | 34         | 48         | 50         | 50    | 50       | 50    | 794   |
| 6          | 30        | 50         | 38         | 48         | 50         | 50    | 50       | 50    | 791.8 |

Bandwidth Statistics Summary

| Explanatory Variables | Optimal Number<br>of Neighbors | Effective Number<br>of Parameters | Adjusted<br>Value of<br>Alpha | Adjusted<br>Critical<br>Value of<br>Pseudo-t<br>Statistics |
|-----------------------|--------------------------------|-----------------------------------|-------------------------------|------------------------------------------------------------|
| Intercept             | 30                             | 28.85                             | 0.0017                        | 3.1577                                                     |
| TOTALPOPUL            | 50                             | 18.68                             | 0.0027                        | 3.025                                                      |
| LACK_HEALT            | 38                             | 23.03                             | 0.0022                        | 3.0894                                                     |
| PHYSICAL_I            | 48                             | 16.75                             | 0.003                         | 2.991                                                      |
| FREQUENT_P            | 50                             | 17.11                             | 0.0029                        | 2.9976                                                     |
| DRUGS                 | 50                             | 17.35                             | 0.0029                        | 3.0019                                                     |
| PVTY_AGE              | 50                             | 19.2                              | 0.0026                        | 3.0335                                                     |
| UNEMP                 | 50                             | 17.99                             | 0.0028                        | 3.0133                                                     |

S2: Summary Statistics for Coefficients Estimates

| Explanatory Variables | Mean  | Standard Deviation | Minimum | Median  | Maximum |
|-----------------------|-------|--------------------|---------|---------|---------|
| Intercept             | -0.09 | 0.49               | -1.2907 | -0.0806 | 1.0211  |
| TOTALPOPUL            | 0.04  | 0.10               | -0.3039 | 0.0383  | 0.4011  |
| LACK_HEALT            | 0.61  | 0.47               | -0.4361 | 0.5369  | 2.7777  |
| PHYSICAL_I            | -0.18 | 0.27               | -0.9839 | -0.1813 | 0.4115  |
| FREQUENT_P            | 0.20  | 0.22               | -0.5789 | 0.1928  | 0.7358  |
| DRUGS                 | -0.38 | 0.23               | -0.899  | -0.3368 | 0.288   |
| PVTY_AGE              | 0.10  | 0.16               | -0.586  | 0.125   | 0.5408  |
| UNEMP                 | 0.03  | 0.17               | -0.594  | 0.0301  | 0.5437  |

Model Diagnostics

| Statistic                    | MGWR      |
|------------------------------|-----------|
| R-Squared                    | 0.9098    |
| Adjusted R-Squared           | 0.8693    |
| AICc                         | 2437.7405 |
| Sigma-Squared                | 0.1307    |
| Sigma-Squared MLE            | 0.0902    |
| Effective Degrees of Freedom | 1261.3482 |

Summary of Explanatory Variables and Neighborhoods

| Explanatory Variables | Neighbors<br>(% of Features) <sup>a</sup> | Significant<br>(% of Features) <sup>b</sup> |
|-----------------------|-------------------------------------------|---------------------------------------------|
| Intercept             | 30 (1.64)                                 | 617 (33.75)                                 |
| TOTALPOPUL            | 50 (2.74)                                 | 87 (4.76)                                   |
| LACK_HEALT            | 50 (2.74)                                 | 1156 (63.24)                                |
| PHYSICAL_I            | 45 (2.46)                                 | 405 (22.16)                                 |
| FREQUENT_P            | 50 (2.74)                                 | 435 (23.80)                                 |
| DRUGS                 | 45 (2.46)                                 | 656 (35.89)                                 |
| PVTY_AGE              | 49 (2.68)                                 | 78 (4.27)                                   |
| UNEMP                 | 50 (2.74)                                 | 39 (2.13)                                   |

a: This number in the parenthesis ranges from 0 to 100%, and can be interpreted as a local, regional, global scale based on the geographical context from low to high.

b: In the parentheses, the percentage of features that have significant coefficients of an explanatory variable.

Optimal Bandwidths Search History

| Iterations | Intercept | TOTALPOPUL | LACK_HEALT | PHYSICAL_I | FREQUENT_P | DRUGS | PVTY_AGE | UNEMP | AICc |
|------------|-----------|------------|------------|------------|------------|-------|----------|-------|------|
| 1          | 30        | 50         | 50         | 50         | 50         | 50    | 50       | 50    | 2865 |
| 2          | 30        | 50         | 50         | 50         | 50         | 49    | 50       | 50    | 2693 |
| 3          | 30        | 50         | 50         | 50         | 50         | 50    | 50       | 50    | 2620 |
| 4          | 30        | 50         | 50         | 50         | 50         | 50    | 50       | 50    | 2574 |
| 5          | 30        | 50         | 50         | 50         | 50         | 50    | 50       | 50    | 2541 |
| 6          | 30        | 50         | 50         | 50         | 50         | 45    | 50       | 50    | 2518 |
| 7          | 30        | 50         | 50         | 50         | 50         | 45    | 49       | 50    | 2499 |
| 8          | 30        | 50         | 50         | 50         | 50         | 45    | 49       | 50    | 2483 |
| 9          | 30        | 50         | 50         | 50         | 50         | 45    | 49       | 50    | 2472 |
| 10         | 30        | 50         | 50         | 50         | 50         | 45    | 49       | 50    | 2463 |
| 11         | 30        | 50         | 50         | 50         | 50         | 45    | 49       | 50    | 2456 |
| 12         | 30        | 50         | 50         | 50         | 50         | 45    | 49       | 50    | 2450 |
| 13         | 30        | 50         | 50         | 50         | 50         | 45    | 49       | 50    | 2446 |
| 14         | 30        | 50         | 50         | 50         | 50         | 45    | 49       | 50    | 2443 |
| 15         | 30        | 50         | 50         | 50         | 50         | 45    | 49       | 50    | 2441 |
| 16         | 30        | 50         | 50         | 50         | 50         | 45    | 49       | 50    | 2438 |

Bandwidth Statistics Summary

| Explanatory Variables | Optimal Number<br>of Neighbors | Effective Number<br>of Parameters | Adjusted<br>Value of<br>Alpha | Adjusted<br>Critical<br>Value of<br>Pseudo-t<br>Statistics |
|-----------------------|--------------------------------|-----------------------------------|-------------------------------|------------------------------------------------------------|
| Intercept             | 30                             | 120.05                            | 0.0004                        | 3.5388                                                     |
| TOTALPOPUL            | 50                             | 72.23                             | 0.0007                        | 3.4011                                                     |
| LACK_HEALT            | 50                             | 50.28                             | 0.001                         | 3.2998                                                     |
| PHYSICAL_I            | 45                             | 56.78                             | 0.0009                        | 3.3341                                                     |
| FREQUENT_P            | 50                             | 53.63                             | 0.0009                        | 3.318                                                      |
| DRUGS                 | 45                             | 74.16                             | 0.0007                        | 3.4083                                                     |
| PVTY_AGE              | 49                             | 70.26                             | 0.0007                        | 3.3934                                                     |
| UNEMP                 | 50                             | 69.27                             | 0.0007                        | 3.3895                                                     |

S3: Summary Statistics for Coefficients Estimates

| Explanatory Variables | Mean  | Standard Deviation | Minimum | Median  | Maximum |
|-----------------------|-------|--------------------|---------|---------|---------|
| Intercept             | 0.15  | 0.33               | -0.405  | 0.0571  | 0.8565  |
| TOTALPOPUL            | -0.01 | 0.12               | -0.2113 | 0.0024  | 0.2299  |
| LACK_HEALT            | 0.27  | 0.26               | -0.1392 | 0.2331  | 0.9842  |
| PHYSICAL_I            | 0.06  | 0.39               | -0.9158 | 0.0875  | 0.8078  |
| FREQUENT_P            | 0.03  | 0.39               | -0.568  | -0.0062 | 0.7426  |
| DRUGS                 | -0.51 | 0.17               | -0.8028 | -0.5411 | -0.107  |
| PVTY_AGE              | 0.13  | 0.13               | -0.0646 | 0.1037  | 0.5189  |
| UNEMP                 | 0.06  | 0.11               | -0.3374 | 0.031   | 0.3573  |

Model Diagnostics

| Statistic                    | GWR      | MGWR     |
|------------------------------|----------|----------|
| R-Squared                    | 0.8637   | 0.8736   |
| Adjusted R-Squared           | 0.7762   | 0.8153   |
| AICc                         | 795.207  | 745.3683 |
| Sigma-Squared                | 0.2235   | 0.1845   |
| Sigma-Squared MLE            | 0.1363   | 0.1264   |
| Effective Degrees of Freedom | 267.1152 | 300.0357 |

Optimal GWR Bandwidth: 50 (K nearest neighbors).

Summary of Explanatory Variables and Neighborhoods

| Explanatory Variables | Neighbors<br>(% of Features) <sup>a</sup> | Significant<br>(% of Features) <sup>b</sup> |
|-----------------------|-------------------------------------------|---------------------------------------------|
| Intercept             | 33 (7.53)                                 | 85 (19.41)                                  |
| TOTALPOPUL            | 50 (11.42)                                | 0 (0.00)                                    |
| LACK_HEALT            | 50 (11.42)                                | 14 (3.20)                                   |
| PHYSICAL_I            | 44 (10.05)                                | 97 (22.15)                                  |
| FREQUENT_P            | 47 (10.73)                                | 157 (35.84)                                 |
| DRUGS                 | 50 (11.42)                                | 304 (69.41)                                 |
| PVTY_AGE              | 50 (11.42)                                | 53 (12.10)                                  |
| UNEMP                 | 50 (11.42)                                | 0 (0.00)                                    |

a: This number in the parenthesis ranges from 0 to 100%, and can be interpreted as a local, regional, global scale based on the geographical context from low to high.

b: In the parentheses, the percentage of features that have significant coefficients of an explanatory variable.

Optimal Bandwidths Search History

| Iterations | Intercept | TOTALPOPUL | LACK_HEALT | PHYSICAL_I | FREQUENT_P | DRUGS | PVTY_AGE | UNEMP | AICc  |
|------------|-----------|------------|------------|------------|------------|-------|----------|-------|-------|
| 0          | 50        | 50         | 50         | 50         | 50         | 50    | 50       | 50    | 795.2 |
| 1          | 33        | 50         | 47         | 41         | 47         | 50    | 50       | 50    | 764.4 |
| 2          | 33        | 50         | 47         | 44         | 47         | 50    | 50       | 50    | 750.6 |
| 3          | 33        | 50         | 50         | 44         | 47         | 50    | 50       | 50    | 745.4 |

Bandwidth Statistics Summary

| Explanatory Variables | Optimal Number<br>of Neighbors | Effective Number<br>of Parameters | Adjusted<br>Value of<br>Alpha | Adjusted<br>Critical<br>Value of<br>Pseudo-t<br>Statistics |
|-----------------------|--------------------------------|-----------------------------------|-------------------------------|------------------------------------------------------------|
| Intercept             | 33                             | 24.69                             | 0.002                         | 3.1138                                                     |
| TOTALPOPUL            | 50                             | 16.76                             | 0.003                         | 2.9939                                                     |
| LACK_HEALT            | 50                             | 15.07                             | 0.0033                        | 2.9604                                                     |
| PHYSICAL_I            | 44                             | 17.57                             | 0.0028                        | 3.0087                                                     |
| FREQUENT_P            | 47                             | 15.79                             | 0.0032                        | 2.9752                                                     |
| DRUGS                 | 50                             | 13.13                             | 0.0038                        | 2.9165                                                     |
| PVTY_AGE              | 50                             | 16.58                             | 0.003                         | 2.9905                                                     |
| UNEMP                 | 50                             | 18.38                             | 0.0027                        | 3.0227                                                     |

S4: Summary Statistics for Coefficients Estimates

| Explanatory Variables | Mean  | Standard Deviation | Minimum | Median  | Maximum |
|-----------------------|-------|--------------------|---------|---------|---------|
| Intercept             | 0.23  | 0.33               | -0.418  | 0.177   | 1.0808  |
| TOTALPOPUL            | 0.00  | 0.17               | -0.3699 | -0.0322 | 0.3274  |
| LACK_HEALTH           | 0.49  | 0.45               | -0.1225 | 0.3199  | 1.6074  |
| PHYSICAL_I            | 0.17  | 0.46               | -0.6688 | 0.2908  | 0.9457  |
| FREQUENT_P            | -0.37 | 0.60               | -1.1439 | -0.289  | 0.8302  |
| DRUGS                 | -0.13 | 0.45               | -0.88   | -0.065  | 0.6182  |
| PVTY_AGE              | 0.27  | 0.40               | -0.3329 | 0.1846  | 0.8547  |
| UNEMP                 | 0.06  | 0.19               | -0.1232 | -0.0034 | 0.58    |

Model Diagnostics

| Statistic                    | GWR      | MGWR     |
|------------------------------|----------|----------|
| R-Squared                    | 0.8381   | 0.8652   |
| Adjusted R-Squared           | 0.7273   | 0.7916   |
| AICc                         | 531.9183 | 503.8539 |
| Sigma-Squared                | 0.2719   | 0.208    |
| Sigma-Squared MLE            | 0.1619   | 0.1348   |
| Effective Degrees of Freedom | 154.1757 | 167.823  |

Optimal GWR Bandwidth: 50 (K nearest neighbors).

Summary of Explanatory Variables and Neighborhoods

| Explanatory Variables | Neighbors<br>(% of Features) <sup>a</sup> | Significant<br>(% of Features) <sup>b</sup> |
|-----------------------|-------------------------------------------|---------------------------------------------|
| Intercept             | 30 (11.58)                                | 44 (16.99)                                  |
| TOTALPOPUL            | 50 (19.31)                                | 31 (11.97)                                  |
| LACK_HEALTH           | 35 (13.51)                                | 67 (25.87)                                  |
| PHYSICAL_I            | 50 (19.31)                                | 42 (16.22)                                  |
| FREQUENT_P            | 34 (13.13)                                | 128 (49.42)                                 |
| DRUGS                 | 50 (19.31)                                | 137 (52.90)                                 |
| PVTY_AGE              | 39 (15.06)                                | 66 (25.48)                                  |
| UNEMP                 | 50 (19.31)                                | 34 (13.13)                                  |

a: This number in the parenthesis ranges from 0 to 100%, and can be interpreted as a local, regional, global scale based on the geographical context from low to high.

b: In the parentheses, the percentage of features that have significant coefficients of an explanatory variable.

Optimal Bandwidths Search History

| Iterations | Intercept | TOTALPOPUL | LACK_HEALTH | PHYSICAL_I | FREQUENT_P | DRUGS | PVTY_AGE | UNEMP | AICc  |
|------------|-----------|------------|-------------|------------|------------|-------|----------|-------|-------|
| 0          | 50        | 50         | 50          | 50         | 50         | 50    | 50       | 50    | 531.9 |
| 1          | 31        | 50         | 35          | 43         | 32         | 50    | 39       | 42    | 526.3 |
| 2          | 31        | 50         | 35          | 47         | 33         | 50    | 39       | 50    | 506.5 |
| 3          | 30        | 50         | 35          | 50         | 34         | 50    | 39       | 50    | 503.9 |

Bandwidth Statistics Summary

| Explanatory Variables | Optimal Number<br>of Neighbors | Effective Number<br>of Parameters | Adjusted<br>Value of<br>Alpha | Adjusted<br>Critical<br>Value of<br>Pseudo-t<br>Statistics |
|-----------------------|--------------------------------|-----------------------------------|-------------------------------|------------------------------------------------------------|
| Intercept             | 30                             | 14.43                             | 0.0035                        | 2.9652                                                     |
| TOTALPOPUL            | 50                             | 10.23                             | 0.0049                        | 2.8524                                                     |
| LACK_HEALTH           | 35                             | 14.34                             | 0.0035                        | 2.9633                                                     |
| PHYSICAL_I            | 50                             | 9.73                              | 0.0051                        | 2.8355                                                     |
| FREQUENT_P            | 34                             | 12.76                             | 0.0039                        | 2.9252                                                     |
| DRUGS                 | 50                             | 9.05                              | 0.0055                        | 2.8112                                                     |
| PVTY_AGE              | 39                             | 10.46                             | 0.0048                        | 2.8597                                                     |
| UNEMP                 | 50                             | 10.17                             | 0.0049                        | 2.8501                                                     |



C1: Summary Statistics for Coefficients Estimates

| Explanatory Variables | Mean  | Standard Deviation | Minimum | Median  | Maximum |
|-----------------------|-------|--------------------|---------|---------|---------|
| Intercept             | 0.05  | 0.10               | -0.1044 | 0.0163  | 0.2021  |
| TOTALPOPUL            | -0.01 | 0.08               | -0.1296 | -0.0364 | 0.1044  |
| LACK_HEALT            | 0.29  | 0.11               | 0.0197  | 0.3068  | 0.4082  |
| PHYSICAL_I            | -0.58 | 0.13               | -0.725  | -0.6108 | -0.3487 |
| FREQUENT_P            | 0.93  | 0.23               | 0.6889  | 0.8029  | 1.385   |
| DRUGS                 | -0.85 | 0.19               | -1.1258 | -0.8067 | -0.5005 |
| PVTY_AGE              | -0.07 | 0.04               | -0.1292 | -0.0465 | -0.0014 |
| UNEMP                 | 0.02  | 0.19               | -0.141  | -0.0769 | 0.4533  |

Model Diagnostics

| Statistic                    | GWR      | MGWR     |
|------------------------------|----------|----------|
| R-Squared                    | 0.8221   | 0.8617   |
| Adjusted R-Squared           | 0.7158   | 0.794    |
| AICc                         | 167.3478 | 151.6801 |
| Sigma-Squared                | 0.2821   | 0.2047   |
| Sigma-Squared MLE            | 0.1779   | 0.1383   |
| Effective Degrees of Freedom | 50.4537  | 54.0294  |

Optimal GWR Bandwidth: 48 (K nearest neighbors).

Summary of Explanatory Variables and Neighborhoods

| Explanatory Variables | Neighbors<br>(% of Features) <sup>a</sup> | Significant<br>(% of Features) <sup>b</sup> |
|-----------------------|-------------------------------------------|---------------------------------------------|
| Intercept             | 50 (62.50)                                | 0 (0.00)                                    |
| TOTALPOPUL            | 45 (56.25)                                | 0 (0.00)                                    |
| LACK_HEALT            | 50 (62.50)                                | 22 (27.50)                                  |
| PHYSICAL_I            | 45 (56.25)                                | 50 (62.50)                                  |
| FREQUENT_P            | 30 (37.50)                                | 80 (100.00)                                 |
| DRUGS                 | 31 (38.75)                                | 74 (92.50)                                  |
| PVTY_AGE              | 50 (62.50)                                | 0 (0.00)                                    |
| UNEMP                 | 33 (41.25)                                | 19 (23.75)                                  |

a: This number in the parenthesis ranges from 0 to 100%, and can be interpreted as a local, regional, global scale based on the geographical context from low to high.

b: In the parentheses, the percentage of features that have significant coefficients of an explanatory variable.

Optimal Bandwidths Search History

| Iterations | Intercept | TOTALPOPUL | LACK_HEALT | PHYSICAL_I | FREQUENT_P | DRUGS | PVTY_AGE | UNEMP | AICc  |
|------------|-----------|------------|------------|------------|------------|-------|----------|-------|-------|
| 0          | 48        | 48         | 48         | 48         | 48         | 48    | 48       | 48    | 167.3 |
| 1          | 50        | 48         | 30         | 45         | 30         | 50    | 50       | 38    | 160.2 |
| 2          | 50        | 45         | 30         | 45         | 30         | 50    | 50       | 32    | 155.4 |
| 3          | 50        | 45         | 50         | 45         | 30         | 30    | 50       | 33    | 151.9 |
| 4          | 50        | 45         | 50         | 45         | 30         | 31    | 50       | 33    | 151.7 |

Bandwidth Statistics Summary

| Explanatory Variables | Optimal Number<br>of Neighbors | Effective Number<br>of Parameters | Adjusted<br>Value of<br>Alpha | Adjusted<br>Critical<br>Value of<br>Pseudo-t<br>Statistics |
|-----------------------|--------------------------------|-----------------------------------|-------------------------------|------------------------------------------------------------|
| Intercept             | 50                             | 2.86                              | 0.0175                        | 2.4524                                                     |
| TOTALPOPUL            | 45                             | 3.43                              | 0.0146                        | 2.5243                                                     |
| LACK_HEALT            | 50                             | 3.13                              | 0.016                         | 2.4871                                                     |
| PHYSICAL_I            | 45                             | 2.76                              | 0.0181                        | 2.4378                                                     |
| FREQUENT_P            | 30                             | 4.22                              | 0.0119                        | 2.6047                                                     |
| DRUGS                 | 31                             | 3.5                               | 0.0143                        | 2.5314                                                     |
| PVTY_AGE              | 50                             | 2.55                              | 0.0196                        | 2.4052                                                     |
| UNEMP                 | 33                             | 3.52                              | 0.0142                        | 2.5342                                                     |

C2: Summary Statistics for Coefficients Estimates

| Explanatory Variables | Mean  | Standard<br>Deviation | Minimum | Median  | Maximum |
|-----------------------|-------|-----------------------|---------|---------|---------|
| Intercept             | 0.08  | 0.39                  | -0.7886 | 0.0112  | 1.2809  |
| TOTALPOPUL            | 0.04  | 0.10                  | -0.232  | 0.0335  | 0.4865  |
| LACK_HEALT            | 0.20  | 0.37                  | -0.7114 | 0.1726  | 0.993   |
| PHYSICAL_I            | -0.06 | 0.43                  | -1.2058 | 0.1139  | 0.5804  |
| FREQUENT_P            | 0.10  | 0.37                  | -0.6911 | 0.1285  | 1.019   |
| DRUGS                 | -0.62 | 0.26                  | -1.2902 | -0.6038 | 0.2089  |
| PVTY_AGE              | 0.34  | 0.16                  | -0.1158 | 0.3552  | 0.8376  |
| UNEMP                 | 0.04  | 0.12                  | -0.2589 | 0.05    | 0.3781  |

Model Diagnostics

| Statistic                    | GWR       | MGWR      |
|------------------------------|-----------|-----------|
| R-Squared                    | 0.918     | 0.9288    |
| Adjusted R-Squared           | 0.8618    | 0.894     |
| AICc                         | 1651.1393 | 1440.4363 |
| Sigma-Squared                | 0.1381    | 0.1059    |
| Sigma-Squared MLE            | 0.082     | 0.0712    |
| Effective Degrees of Freedom | 728.3559  | 824.413   |

Optimal GWR Bandwidth: 50 (K nearest neighbors).

Summary of Explanatory Variables and Neighborhoods

| Explanatory Variables | Neighbors<br>(% of Features) <sup>a</sup> | Significant<br>(% of Features) <sup>b</sup> |
|-----------------------|-------------------------------------------|---------------------------------------------|
| Intercept             | 30 (2.45)                                 | 248 (20.23)                                 |
| TOTALPOPUL            | 50 (4.08)                                 | 47 (3.83)                                   |
| LACK_HEALT            | 50 (4.08)                                 | 143 (11.66)                                 |
| PHYSICAL_I            | 50 (4.08)                                 | 152 (12.40)                                 |
| FREQUENT_P            | 50 (4.08)                                 | 132 (10.77)                                 |
| DRUGS                 | 32 (2.61)                                 | 829 (67.62)                                 |
| PVTY_AGE              | 50 (4.08)                                 | 715 (58.32)                                 |
| UNEMP                 | 50 (4.08)                                 | 28 (2.28)                                   |

a: This number in the parenthesis ranges from 0 to 100%, and can be interpreted as a local, regional, global scale based on the geographical context from low to high.

b: In the parentheses, the percentage of features that have significant coefficients of an explanatory variable.

Optimal Bandwidths Search History

| Iterations | Intercept | TOTALPOPUL | LACK_HEALT | PHYSICAL_I | FREQUENT_P | DRUGS | PVTY_AGE | UNEMP | AICc |
|------------|-----------|------------|------------|------------|------------|-------|----------|-------|------|
| 0          | 50        | 50         | 50         | 50         | 50         | 50    | 50       | 50    | 1651 |
| 1          | 30        | 50         | 30         | 30         | 31         | 32    | 47       | 50    | 1696 |
| 2          | 30        | 50         | 30         | 31         | 38         | 32    | 47       | 50    | 1573 |
| 3          | 30        | 50         | 38         | 38         | 45         | 32    | 50       | 50    | 1511 |
| 4          | 30        | 50         | 38         | 38         | 50         | 32    | 50       | 50    | 1491 |
| 5          | 30        | 50         | 38         | 38         | 50         | 32    | 50       | 50    | 1480 |
| 6          | 30        | 50         | 38         | 38         | 50         | 32    | 50       | 50    | 1474 |
| 7          | 30        | 50         | 44         | 38         | 50         | 32    | 50       | 50    | 1467 |
| 8          | 30        | 50         | 50         | 38         | 50         | 32    | 50       | 50    | 1463 |
| 9          | 30        | 50         | 50         | 50         | 50         | 32    | 50       | 50    | 1449 |
| 10         | 30        | 50         | 50         | 50         | 50         | 32    | 50       | 50    | 1444 |
| 11         | 30        | 50         | 50         | 50         | 50         | 32    | 50       | 50    | 1442 |
| 12         | 30        | 50         | 50         | 50         | 50         | 32    | 50       | 50    | 1440 |

Bandwidth Statistics Summary

| Explanatory Variables | Optimal Number<br>of Neighbors | Effective Number<br>of Parameters | Adjusted<br>Value of<br>Alpha | Adjusted<br>Critical<br>Value of<br>Pseudo-t<br>Statistics |
|-----------------------|--------------------------------|-----------------------------------|-------------------------------|------------------------------------------------------------|
| Intercept             | 30                             | 79.01                             | 0.0006                        | 3.4303                                                     |
| TOTALPOPUL            | 50                             | 52.43                             | 0.001                         | 3.3158                                                     |
| LACK_HEALT            | 50                             | 37.9                              | 0.0013                        | 3.2228                                                     |
| PHYSICAL_I            | 50                             | 38.89                             | 0.0013                        | 3.2303                                                     |
| FREQUENT_P            | 50                             | 37.33                             | 0.0013                        | 3.2184                                                     |
| DRUGS                 | 32                             | 63.79                             | 0.0008                        | 3.371                                                      |
| PVTY_AGE              | 50                             | 45.05                             | 0.0011                        | 3.2726                                                     |
| UNEMP                 | 50                             | 47.18                             | 0.0011                        | 3.2859                                                     |

C3: Summary Statistics for Coefficients Estimates

| Explanatory Variables | Mean  | Standard<br>Deviation | Minimum | Median  | Maximum |
|-----------------------|-------|-----------------------|---------|---------|---------|
| Intercept             | 0.08  | 0.43                  | -0.823  | 0.0469  | 1.8931  |
| TOTALPOPUL            | -0.05 | 0.16                  | -0.6711 | -0.0433 | 0.4831  |
| LACK_HEALT            | 0.16  | 0.43                  | -0.6418 | 0.0316  | 1.395   |
| PHYSICAL_I            | 0.21  | 0.67                  | -1.1639 | 0.2375  | 2.0207  |
| FREQUENT_P            | 0.08  | 0.52                  | -1.2284 | 0.0691  | 1.3948  |
| DRUGS                 | -0.32 | 0.30                  | -0.8265 | -0.3753 | 0.562   |
| PVTY_AGE              | 0.20  | 0.24                  | -0.49   | 0.1702  | 0.8605  |
| UNEMP                 | 0.05  | 0.12                  | -0.3229 | 0.0624  | 0.3177  |

Model Diagnostics

| Statistic                    | GWR       | MGWR      |
|------------------------------|-----------|-----------|
| R-Squared                    | 0.8706    | 0.8895    |
| Adjusted R-Squared           | 0.7831    | 0.8305    |
| AICc                         | 1290.8426 | 1225.2677 |
| Sigma-Squared                | 0.2167    | 0.1694    |
| Sigma-Squared MLE            | 0.1294    | 0.1105    |
| Effective Degrees of Freedom | 428.1053  | 467.9087  |

Optimal GWR Bandwidth: 49 (K nearest neighbors).

Summary of Explanatory Variables and Neighborhoods

| Explanatory Variables | Neighbors<br>(% of Features) <sup>a</sup> | Significant<br>(% of Features) <sup>b</sup> |
|-----------------------|-------------------------------------------|---------------------------------------------|
| Intercept             | 31 (4.32)                                 | 114 (15.90)                                 |
| TOTALPOPUL            | 50 (6.97)                                 | 44 (6.14)                                   |
| LACK_HEALT            | 42 (5.86)                                 | 31 (4.32)                                   |
| PHYSICAL_I            | 39 (5.44)                                 | 113 (15.76)                                 |
| FREQUENT_P            | 36 (5.02)                                 | 101 (14.09)                                 |
| DRUGS                 | 39 (5.44)                                 | 276 (38.49)                                 |
| PVTY_AGE              | 42 (5.86)                                 | 101 (14.09)                                 |
| UNEMP                 | 50 (6.97)                                 | 31 (4.32)                                   |

a: This number in the parenthesis ranges from 0 to 100%, and can be interpreted as a local, regional, global scale based on the geographical context from low to high.

b: In the parentheses, the percentage of features that have significant coefficients of an explanatory variable.

Optimal Bandwidths Search History

| Iterations | Intercept | TOTALPOPUL | LACK_HEALT | PHYSICAL_I | FREQUENT_P | DRUGS | PVTY_AGE | UNEMP | AICc |
|------------|-----------|------------|------------|------------|------------|-------|----------|-------|------|
| 0          | 49        | 49         | 49         | 49         | 49         | 49    | 49       | 49    | 1291 |
| 1          | 30        | 39         | 30         | 30         | 32         | 42    | 43       | 50    | 1352 |
| 2          | 30        | 48         | 30         | 33         | 35         | 39    | 42       | 50    | 1272 |
| 3          | 31        | 48         | 35         | 39         | 36         | 39    | 43       | 50    | 1242 |
| 4          | 31        | 50         | 42         | 39         | 36         | 39    | 42       | 50    | 1225 |

Bandwidth Statistics Summary

| Explanatory Variables | Optimal Number<br>of Neighbors | Effective Number<br>of Parameters | Adjusted<br>Value of<br>Alpha | Adjusted<br>Critical<br>Value of<br>Pseudo-t<br>Statistics |
|-----------------------|--------------------------------|-----------------------------------|-------------------------------|------------------------------------------------------------|
| Intercept             | 31                             | 38.82                             | 0.0013                        | 3.2383                                                     |
| TOTALPOPUL            | 50                             | 26.72                             | 0.0019                        | 3.1278                                                     |
| LACK_HEALT            | 42                             | 32.11                             | 0.0016                        | 3.1825                                                     |
| PHYSICAL_I            | 39                             | 32.56                             | 0.0015                        | 3.1867                                                     |
| FREQUENT_P            | 36                             | 33.35                             | 0.0015                        | 3.1937                                                     |
| DRUGS                 | 39                             | 30.59                             | 0.0016                        | 3.1682                                                     |
| PVTY_AGE              | 42                             | 29.24                             | 0.0017                        | 3.1547                                                     |
| UNEMP                 | 50                             | 25.71                             | 0.0019                        | 3.1161                                                     |

T1: Summary Statistics for Coefficients Estimates

| Explanatory Variables | Mean  | Standard Deviation | Minimum | Median  | Maximum |
|-----------------------|-------|--------------------|---------|---------|---------|
| Intercept             | 0.18  | 0.59               | -1.5055 | 0.1209  | 1.9182  |
| TOTALPOPUL            | 0.00  | 0.11               | -0.3014 | -0.0077 | 0.3435  |
| LACK_HEALT            | 0.82  | 0.64               | -0.9248 | 0.6469  | 2.4826  |
| PHYSICAL_I            | -0.01 | 0.34               | -0.8506 | 0.0161  | 1.0961  |
| FREQUENT_P            | 0.12  | 0.28               | -0.5831 | 0.1332  | 0.7579  |
| DRUGS                 | -0.21 | 0.23               | -1.2194 | -0.1629 | 0.4621  |
| PVTY_AGE              | 0.05  | 0.13               | -0.3027 | 0.0263  | 0.5248  |
| UNEMP                 | 0.03  | 0.10               | -0.4953 | 0.0226  | 0.6891  |

Model Diagnostics

| Statistic                    | GWR       | MGWR    |
|------------------------------|-----------|---------|
| R-Squared                    | 0.8986    | 0.9129  |
| Adjusted R-Squared           | 0.8311    | 0.8659  |
| AICc                         | 3344.1366 | 3245.52 |
| Sigma-Squared                | 0.1688    | 0.1341  |
| Sigma-Squared MLE            | 0.1014    | 0.0871  |
| Effective Degrees of Freedom | 1316.8864 | 1422.88 |

Optimal GWR Bandwidth: 50 (K nearest neighbors).

Summary of Explanatory Variables and Neighborhoods

| Explanatory Variables | Neighbors<br>(% of Features) <sup>a</sup> | Significant<br>(% of Features) <sup>b</sup> |
|-----------------------|-------------------------------------------|---------------------------------------------|
| Intercept             | 30 (1.37)                                 | 700 (31.93)                                 |
| TOTALPOPUL            | 50 (2.28)                                 | 19 (0.87)                                   |
| LACK_HEALT            | 37 (1.69)                                 | 917 (41.83)                                 |
| PHYSICAL_I            | 50 (2.28)                                 | 104 (4.74)                                  |
| FREQUENT_P            | 35 (1.60)                                 | 133 (6.07)                                  |
| DRUGS                 | 31 (1.41)                                 | 318 (14.51)                                 |
| PVTY_AGE              | 50 (2.28)                                 | 68 (3.10)                                   |
| UNEMP                 | 50 (2.28)                                 | 39 (1.78)                                   |

a: This number in the parenthesis ranges from 0 to 100%, and can be interpreted as a local, regional, global scale based on the geographical context from low to high.

b: In the parentheses, the percentage of features that have significant coefficients of an explanatory variable.

Optimal Bandwidths Search History

| Iterations | Intercept | TOTALPOPUL | LACK_HEALT | PHYSICAL_I | FREQUENT_P | DRUGS | PVTY_AGE | UNEMP | AICc |
|------------|-----------|------------|------------|------------|------------|-------|----------|-------|------|
| 0          | 50        | 50         | 50         | 50         | 50         | 50    | 50       | 50    | 3344 |
| 1          | 30        | 50         | 30         | 30         | 31         | 43    | 50       | 50    | 3519 |
| 2          | 30        | 50         | 30         | 30         | 34         | 43    | 50       | 50    | 3358 |
| 3          | 30        | 50         | 30         | 30         | 35         | 43    | 50       | 50    | 3319 |
| 4          | 30        | 50         | 34         | 30         | 35         | 43    | 50       | 50    | 3295 |
| 5          | 30        | 50         | 35         | 34         | 35         | 37    | 50       | 50    | 3284 |
| 6          | 30        | 50         | 35         | 45         | 35         | 34    | 50       | 50    | 3269 |
| 7          | 30        | 50         | 35         | 50         | 35         | 31    | 50       | 50    | 3265 |
| 8          | 30        | 50         | 35         | 50         | 35         | 31    | 50       | 50    | 3258 |
| 9          | 30        | 50         | 36         | 50         | 35         | 31    | 50       | 50    | 3253 |
| 10         | 30        | 50         | 36         | 50         | 35         | 31    | 50       | 50    | 3250 |
| 11         | 30        | 50         | 36         | 50         | 35         | 31    | 50       | 50    | 3249 |
| 12         | 30        | 50         | 37         | 50         | 35         | 31    | 50       | 50    | 3247 |
| 13         | 30        | 50         | 37         | 50         | 35         | 31    | 50       | 50    | 3246 |
| 14         | 30        | 50         | 37         | 50         | 35         | 31    | 50       | 50    | 3246 |
| 15         | 30        | 50         | 37         | 50         | 35         | 31    | 50       | 50    | 3246 |

Bandwidth Statistics Summary

| Explanatory Variables | Optimal Number<br>of Neighbors | Effective Number<br>of Parameters | Adjusted<br>Value of<br>Alpha | Adjusted<br>Critical<br>Value of<br>Pseudo-t<br>Statistics |
|-----------------------|--------------------------------|-----------------------------------|-------------------------------|------------------------------------------------------------|
| Intercept             | 30                             | 126.49                            | 0.0004                        | 3.5517                                                     |
| TOTALPOPUL            | 50                             | 86.66                             | 0.0006                        | 3.45                                                       |
| LACK_HEALT            | 37                             | 92.14                             | 0.0005                        | 3.4667                                                     |
| PHYSICAL_I            | 50                             | 58.63                             | 0.0009                        | 3.3422                                                     |
| FREQUENT_P            | 35                             | 104.78                            | 0.0005                        | 3.5014                                                     |
| DRUGS                 | 31                             | 133.22                            | 0.0004                        | 3.5654                                                     |
| PVTY_AGE              | 50                             | 82.69                             | 0.0006                        | 3.4372                                                     |
| UNEMP                 | 50                             | 84.52                             | 0.0006                        | 3.4432                                                     |

T2: Summary Statistics for Coefficients Estimates

| Explanatory Variables | Mean  | Standard<br>Deviation | Minimum | Median  | Maximum |
|-----------------------|-------|-----------------------|---------|---------|---------|
| Intercept             | 0.22  | 0.81                  | -2.0195 | 0.1618  | 2.6403  |
| TOTALPOPUL            | 0.06  | 0.19                  | -0.6826 | 0.0366  | 1.2062  |
| LACK_HEALT            | 1.03  | 0.64                  | -0.8422 | 1.0579  | 2.8802  |
| PHYSICAL_I            | -0.08 | 0.45                  | -1.4382 | -0.0839 | 2.1271  |
| FREQUENT_P            | 0.06  | 0.31                  | -1.2115 | 0.0421  | 1.0676  |
| DRUGS                 | -0.02 | 0.13                  | -1.2359 | -0.0156 | 0.469   |
| PVTY_AGE              | 0.02  | 0.09                  | -0.2847 | 0.0148  | 0.4231  |
| UNEMP                 | 0.01  | 0.09                  | -0.3399 | 0.0054  | 0.616   |

Model Diagnostics

| Statistic                    | GWR       | MGWR      |
|------------------------------|-----------|-----------|
| R-Squared                    | 0.9434    | 0.9514    |
| Adjusted R-Squared           | 0.9016    | 0.9225    |
| AICc                         | 6083.0738 | 6091.4206 |
| Sigma-Squared                | 0.0984    | 0.0775    |
| Sigma-Squared MLE            | 0.0566    | 0.0486    |
| Effective Degrees of Freedom | 3497.3702 | 3812.5287 |

Optimal GWR Bandwidth: 50 (K nearest neighbors).

Summary of Explanatory Variables and Neighborhoods

| Explanatory Variables | Neighbors<br>(% of Features) <sup>a</sup> | Significant<br>(% of Features) <sup>b</sup> |
|-----------------------|-------------------------------------------|---------------------------------------------|
| Intercept             | 30 (0.49)                                 | 2120 (34.89)                                |
| TOTALPOPUL            | 50 (0.82)                                 | 57 (0.94)                                   |
| LACK_HEALT            | 32 (0.53)                                 | 2582 (42.50)                                |
| PHYSICAL_I            | 33 (0.54)                                 | 412 (6.78)                                  |
| FREQUENT_P            | 34 (0.56)                                 | 347 (5.71)                                  |
| DRUGS                 | 35 (0.58)                                 | 76 (1.25)                                   |
| PVTY_AGE              | 50 (0.82)                                 | 60 (0.99)                                   |
| UNEMP                 | 50 (0.82)                                 | 63 (1.04)                                   |

a: This number in the parenthesis ranges from 0 to 100%, and can be interpreted as a local, regional, global scale based on the geographical context from low to high.

b: In the parentheses, the percentage of features that have significant coefficients of an explanatory variable.

Optimal Bandwidths Search History

| Iterations | Intercept | TOTALPOPUL | LACK_HEALT | PHYSICAL_I | FREQUENT_P | DRUGS | PVTY_AGE | UNEMP | AICc |
|------------|-----------|------------|------------|------------|------------|-------|----------|-------|------|
| 0          | 50        | 50         | 50         | 50         | 50         | 50    | 50       | 50    | 6083 |
| 1          | 30        | 37         | 30         | 30         | 30         | 41    | 50       | 50    | 7260 |
| 2          | 30        | 41         | 30         | 30         | 31         | 36    | 50       | 50    | 6564 |
| 3          | 30        | 50         | 30         | 30         | 32         | 35    | 50       | 50    | 6299 |
| 4          | 30        | 50         | 31         | 31         | 34         | 35    | 50       | 50    | 6167 |
| 5          | 30        | 50         | 32         | 33         | 34         | 35    | 50       | 50    | 6091 |

Bandwidth Statistics Summary

| Explanatory Variables | Optimal Number<br>of Neighbors | Effective Number<br>of Parameters | Adjusted<br>Value of<br>Alpha | Adjusted<br>Critical<br>Value of<br>Pseudo-t<br>Statistics |
|-----------------------|--------------------------------|-----------------------------------|-------------------------------|------------------------------------------------------------|
| Intercept             | 30                             | 323.23                            | 0.0002                        | 3.7872                                                     |
| TOTALPOPUL            | 50                             | 206.78                            | 0.0002                        | 3.6743                                                     |
| LACK_HEALT            | 32                             | 298.6                             | 0.0002                        | 3.7674                                                     |
| PHYSICAL_I            | 33                             | 297.15                            | 0.0002                        | 3.7662                                                     |
| FREQUENT_P            | 34                             | 293.97                            | 0.0002                        | 3.7635                                                     |
| DRUGS                 | 35                             | 351.13                            | 0.0001                        | 3.8078                                                     |
| PVTY_AGE              | 50                             | 244.5                             | 0.0002                        | 3.717                                                      |
| UNEMP                 | 50                             | 248.1                             | 0.0002                        | 3.7207                                                     |

T3: Summary Statistics for Coefficients Estimates

| Explanatory Variables | Mean  | Standard Deviation | Minimum | Median  | Maximum |
|-----------------------|-------|--------------------|---------|---------|---------|
| Intercept             | 0.28  | 0.93               | -2.7586 | 0.0871  | 2.9417  |
| TOTALPOPUL            | 0.05  | 0.13               | -0.4203 | 0.0345  | 0.5143  |
| LACK_HEALT            | 1.11  | 0.74               | -1.4147 | 1.0448  | 3.6423  |
| PHYSICAL_I            | -0.23 | 0.56               | -3.5351 | -0.2062 | 1.843   |
| FREQUENT_P            | 0.19  | 0.40               | -1.2605 | 0.1675  | 2.2777  |
| DRUGS                 | -0.02 | 0.13               | -0.6584 | -0.0081 | 0.4739  |
| PVTY_AGE              | 0.04  | 0.09               | -0.3473 | 0.0321  | 0.6045  |
| UNEMP                 | 0.04  | 0.10               | -0.2931 | 0.0331  | 0.5575  |

Model Diagnostics

| Statistic                    | GWR       | MGWR      |
|------------------------------|-----------|-----------|
| R-Squared                    | 0.9351    | 0.9421    |
| Adjusted R-Squared           | 0.8866    | 0.9099    |
| AICc                         | 8113.262  | 7777.2422 |
| Sigma-Squared                | 0.1134    | 0.0901    |
| Sigma-Squared MLE            | 0.0649    | 0.0579    |
| Effective Degrees of Freedom | 4037.9784 | 4533.2887 |

Optimal GWR Bandwidth: 50 (K nearest neighbors).

Summary of Explanatory Variables and Neighborhoods

| Explanatory Variables | Neighbors<br>(% of Features) <sup>a</sup> | Significant<br>(% of Features) <sup>b</sup> |
|-----------------------|-------------------------------------------|---------------------------------------------|
| Intercept             | 30 (0.43)                                 | 2653 (37.60)                                |
| TOTALPOPUL            | 50 (0.71)                                 | 12 (0.17)                                   |
| LACK_HEALT            | 30 (0.43)                                 | 2525 (35.79)                                |
| PHYSICAL_I            | 47 (0.67)                                 | 832 (11.79)                                 |
| FREQUENT_P            | 34 (0.48)                                 | 652 (9.24)                                  |
| DRUGS                 | 47 (0.67)                                 | 70 (0.99)                                   |
| PVTY_AGE              | 50 (0.71)                                 | 39 (0.55)                                   |
| UNEMP                 | 50 (0.71)                                 | 87 (1.23)                                   |

a: This number in the parenthesis ranges from 0 to 100%, and can be interpreted as a local, regional, global scale based on the geographical context from low to high.

b: In the parentheses, the percentage of features that have significant coefficients of an explanatory variable.

Optimal Bandwidths Search History

| Iterations | Intercept | TOTALPOPUL | LACK_HEALT | PHYSICAL_I | FREQUENT_P | DRUGS | PVTY_AGE | UNEMP | AICc     |
|------------|-----------|------------|------------|------------|------------|-------|----------|-------|----------|
| 0          | 50        | 50         | 50         | 50         | 50         | 50    | 50       | 50    | 8113.262 |
| 1          | 30        | 47         | 30         | 30         | 30         | 49    | 50       | 50    | 9527.325 |
| 2          | 30        | 50         | 30         | 30         | 30         | 47    | 50       | 50    | 8488.045 |
| 3          | 30        | 50         | 30         | 30         | 31         | 47    | 50       | 50    | 8212.412 |
| 4          | 30        | 50         | 30         | 31         | 31         | 47    | 50       | 50    | 8077.249 |
| 5          | 30        | 50         | 30         | 35         | 31         | 47    | 50       | 50    | 7983.217 |
| 6          | 30        | 50         | 30         | 39         | 30         | 47    | 50       | 50    | 7927.762 |
| 7          | 30        | 50         | 30         | 42         | 31         | 47    | 50       | 50    | 7868.183 |
| 8          | 30        | 50         | 30         | 44         | 31         | 47    | 50       | 50    | 7842.309 |
| 9          | 30        | 50         | 30         | 45         | 34         | 47    | 50       | 50    | 7791.662 |
| 10         | 30        | 50         | 30         | 47         | 34         | 47    | 50       | 50    | 7777.242 |

Bandwidth Statistics Summary

| Explanatory Variables | Optimal Number<br>of Neighbors | Effective Number<br>of Parameters | Adjusted<br>Value of<br>Alpha | Adjusted<br>Critical<br>Value of<br>Pseudo-t<br>Statistics |
|-----------------------|--------------------------------|-----------------------------------|-------------------------------|------------------------------------------------------------|
| Intercept             | 30                             | 391.1                             | 0.0001                        | 3.8339                                                     |
| TOTALPOPUL            | 50                             | 258.25                            | 0.0002                        | 3.7303                                                     |
| LACK_HEALT            | 30                             | 388.64                            | 0.0001                        | 3.8323                                                     |
| PHYSICAL_I            | 47                             | 224.88                            | 0.0002                        | 3.6952                                                     |
| FREQUENT_P            | 34                             | 369.15                            | 0.0001                        | 3.8196                                                     |
| DRUGS                 | 47                             | 309.55                            | 0.0002                        | 3.7758                                                     |
| PVTY_AGE              | 50                             | 286.53                            | 0.0002                        | 3.7565                                                     |
| UNEMP                 | 50                             | 294.61                            | 0.0002                        | 3.7634                                                     |

T4: Summary Statistics for Coefficients Estimates

| Explanatory Variables | Mean  | Standard Deviation | Minimum | Median  | Maximum |
|-----------------------|-------|--------------------|---------|---------|---------|
| Intercept             | 0.21  | 1.06               | -2.8705 | 0.0893  | 3.5948  |
| TOTALPOPUL            | 0.04  | 0.13               | -0.5057 | 0.0333  | 0.7059  |
| LACK_HEALT            | 0.84  | 0.66               | -1.0755 | 0.7385  | 3.3034  |
| PHYSICAL_I            | -0.12 | 0.51               | -1.8222 | -0.1143 | 2.099   |
| FREQUENT_P            | 0.23  | 0.42               | -1.0426 | 0.2323  | 1.8799  |
| DRUGS                 | -0.05 | 0.16               | -0.9874 | -0.0291 | 0.6811  |
| PVTY_AGE              | 0.06  | 0.11               | -0.4068 | 0.0423  | 0.9914  |
| UNEMP                 | 0.03  | 0.11               | -0.2897 | 0.0091  | 0.758   |

Model Diagnostics

| Statistic                    | GWR       | MGWR      |
|------------------------------|-----------|-----------|
| R-Squared                    | 0.9326    | 0.9385    |
| Adjusted R-Squared           | 0.8809    | 0.9027    |
| AICc                         | 8991.4105 | 9097.9518 |
| Sigma-Squared                | 0.1191    | 0.0973    |
| Sigma-Squared MLE            | 0.0674    | 0.0615    |
| Effective Degrees of Freedom | 4243.0193 | 4737.9561 |

Optimal GWR Bandwidth: 50 (K nearest neighbors).

Summary of Explanatory Variables and Neighborhoods

| Explanatory Variables | Neighbors<br>(% of Features) <sup>a</sup> | Significant<br>(% of Features) <sup>b</sup> |
|-----------------------|-------------------------------------------|---------------------------------------------|
| Intercept             | 32 (0.43)                                 | 1541 (20.56)                                |
| TOTALPOPUL            | 50 (0.67)                                 | 92 (1.23)                                   |
| LACK_HEALT            | 34 (0.45)                                 | 1078 (14.38)                                |
| PHYSICAL_I            | 33 (0.44)                                 | 329 (4.39)                                  |
| FREQUENT_P            | 36 (0.48)                                 | 414 (5.52)                                  |
| DRUGS                 | 38 (0.51)                                 | 162 (2.16)                                  |
| PVTY_AGE              | 50 (0.67)                                 | 97 (1.29)                                   |
| UNEMP                 | 50 (0.67)                                 | 125 (1.67)                                  |

a: This number in the parenthesis ranges from 0 to 100%, and can be interpreted as a local, regional, global scale based on the geographical context from low to high.

b: In the parentheses, the percentage of features that have significant coefficients of an explanatory variable.

Optimal Bandwidths Search History

| Iterations | Intercept | TOTALPOPUL | LACK_HEALT | PHYSICAL_I | FREQUENT_P | DRUGS | PVTY_AGE | UNEMP | AICc     |
|------------|-----------|------------|------------|------------|------------|-------|----------|-------|----------|
| 0          | 50        | 50         | 50         | 50         | 50         | 50    | 50       | 50    | 8991.411 |
| 1          | 30        | 50         | 30         | 30         | 30         | 47    | 50       | 50    | 10741.03 |
| 2          | 30        | 48         | 30         | 30         | 30         | 46    | 50       | 50    | 9688.996 |
| 3          | 30        | 50         | 30         | 30         | 30         | 42    | 50       | 50    | 9416.649 |
| 4          | 30        | 50         | 32         | 30         | 34         | 39    | 50       | 50    | 9243.102 |
| 5          | 32        | 50         | 34         | 33         | 36         | 38    | 50       | 50    | 9097.952 |

Bandwidth Statistics Summary

| Explanatory Variables | Optimal Number<br>of Neighbors | Effective Number<br>of Parameters | Adjusted<br>Value of<br>Alpha | Adjusted<br>Critical<br>Value of<br>Pseudo-t<br>Statistics |
|-----------------------|--------------------------------|-----------------------------------|-------------------------------|------------------------------------------------------------|
| Intercept             | 32                             | 394.19                            | 0.0001                        | 3.8357                                                     |
| TOTALPOPUL            | 50                             | 304.59                            | 0.0002                        | 3.7716                                                     |
| LACK_HEALT            | 34                             | 362.96                            | 0.0001                        | 3.8153                                                     |
| PHYSICAL_I            | 33                             | 375.54                            | 0.0001                        | 3.8237                                                     |
| FREQUENT_P            | 36                             | 337.03                            | 0.0001                        | 3.7969                                                     |
| DRUGS                 | 38                             | 387.48                            | 0.0001                        | 3.8314                                                     |
| PVTY_AGE              | 50                             | 291.65                            | 0.0002                        | 3.7608                                                     |
| UNEMP                 | 50                             | 303.6                             | 0.0002                        | 3.7708                                                     |

## Moran's I Statistic for Prevalence of mental Health: ZCTA-level (left panel) and County-level (right panel)

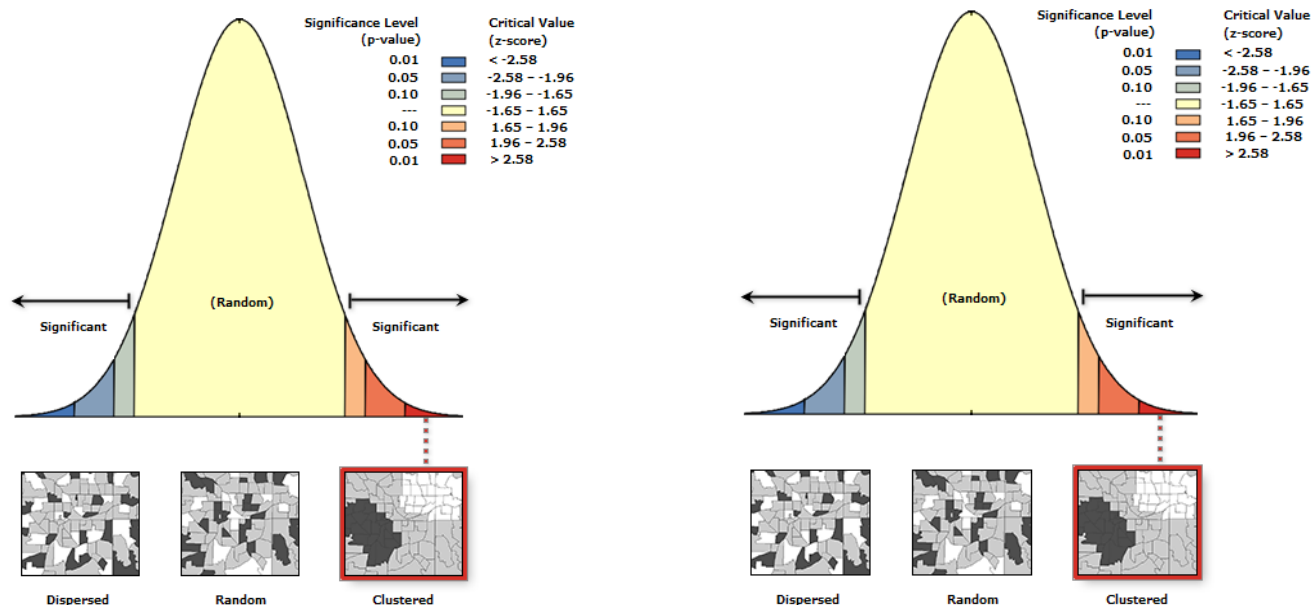

The Moran's I statistic for mental health at the ZCTA-level is 0.56 with a z-score of 624, while for mental health at the county-level are 0.70 with z-score of 121. In both models, there is a less than 1% chance that the clustered patterns are a result of chance. The following maps visually illustrate this point in which despite of aggregations mental health at both levels display remarkably similar spatial patterns.

## Hot Spot Analysis for Crude Prevalence of Mental Health Not Good for > 14 days among Adults 18 Years or Older for ZCTAs (left) and Counties (right)

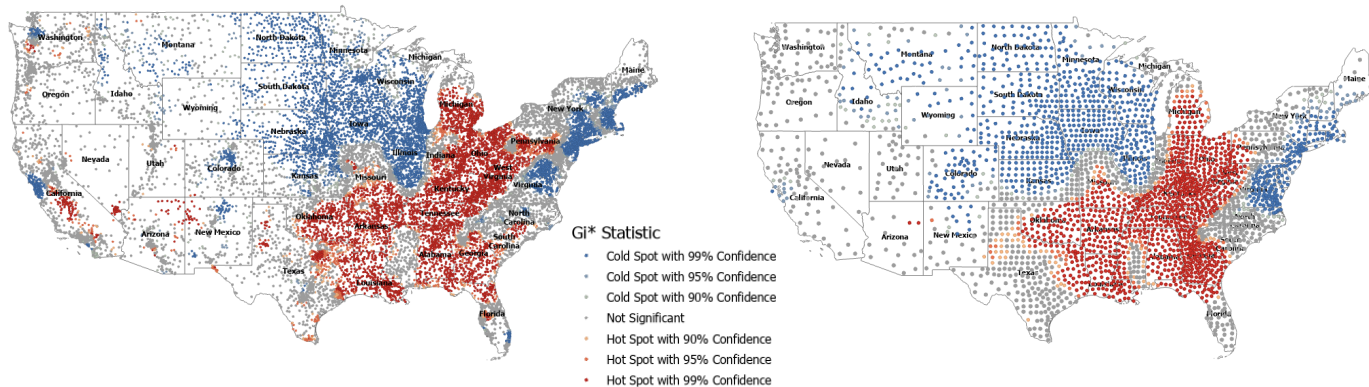

Supplement: s1 [file s1]
